# Supplementary material for: Maskless photolithography using UV LEDs
Source: Royal Society of Chemistry journal article supplement (doi:10.1039/b800465j), 2008-01-01
Supplement: b800465j.pdf [file b800465j.pdf]

a.

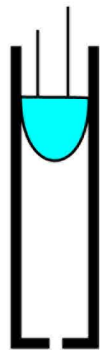

UV LED

black tube

3 mm pinhole

50X

50x microscope objective

substrate on moving stage

b.

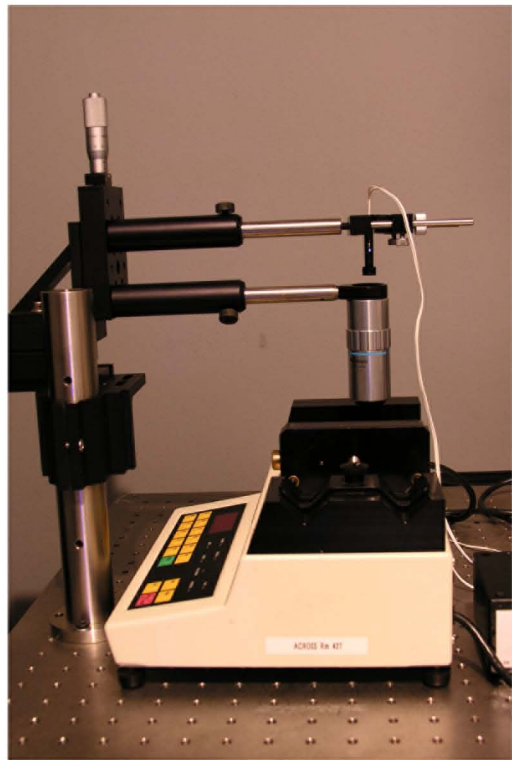

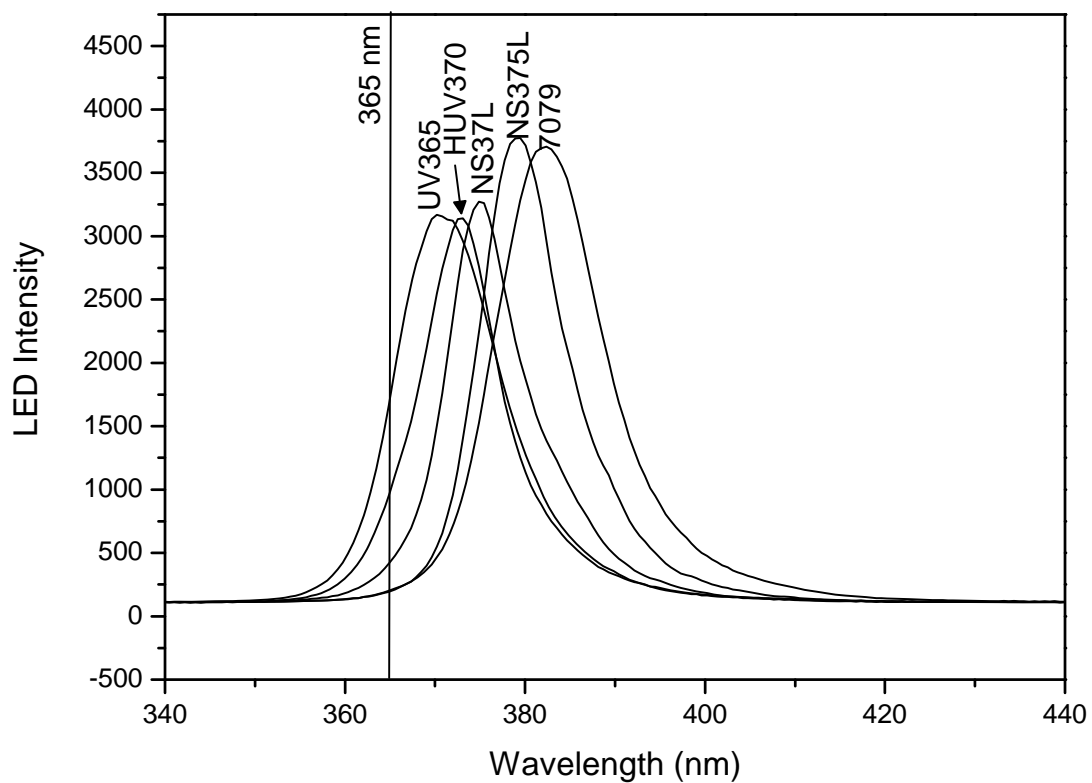

Emission spectra of the LEDs considered for this work
